# Supplementary material for: TiO2 superstructures with oriented nanospaces: a strategy for efficient and selective photocatalysis
Source: Royal Society of Chemistry journal article supplement (doi:10.1039/c9nr10435f), 2020-01-01
Supplement: c9nr10435f1.pdf [file c9nr10435f1.pdf]

Electronic supplementary information (ESI)

TiO<sub>2</sub> superstructures with oriented nanospaces: A strategy  
for efficient and selective photocatalysis

Yuta Murakami,<sup>a</sup> Takashi Kamegawa,<sup>b</sup> Yasuhiro Kobori<sup>ac</sup> and Takashi Tachikawa<sup>\*ac</sup>

<sup>a</sup> Department of Chemistry, Graduate School of Science, Kobe University, 1-1 Rokkodai-cho, Nada-ku, Kobe 657-8501, Japan

<sup>b</sup> Department of Applied Chemistry, Graduate school of engineering, Osaka Prefecture University, 1-2, Gakuen-cho, Naka-ku, Sakai, Osaka 599-8570, Japan

<sup>c</sup> Molecular Photoscience Research Center, Kobe University, 1-1 Rokkodai-cho, Nada-ku, Kobe 657-8501, Japan

\*E-mail: [tachikawa@port.kobe-u.ac.jp](mailto:tachikawa@port.kobe-u.ac.jp); TEL: +81-78-803-5736.

**Table S1.** Structural parameters of TMCs and reference samples

| samples         | surface area,<br>$\text{m}^2 \text{g}^{-1}$ | mean pore size,<br>nm | pore volume,<br>$\text{cm}^3 \text{g}^{-1}$ | particle size,<br>nm <sup>a</sup> |
|-----------------|---------------------------------------------|-----------------------|---------------------------------------------|-----------------------------------|
| TMC-400         | 42                                          | 39                    | 0.41                                        | 20                                |
| crushed TMC-400 | 28                                          | 51                    | 0.35                                        | 20                                |
| TMC-800         | 13                                          | 24                    | 0.076                                       | 29                                |
| P25             | 52                                          | 26                    | 0.39                                        | 25                                |

<sup>a</sup> Determined from the Scherrer's equation.

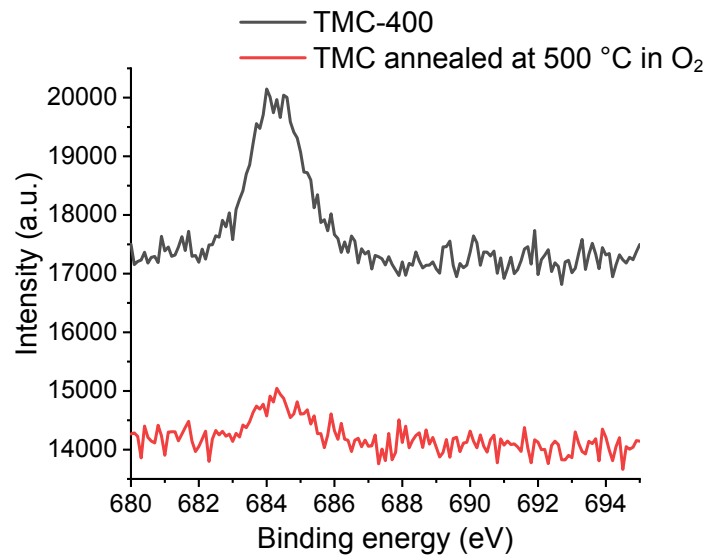

**Fig. S1** F 1s XPS spectra of TMR-400 and TMR sintered at 500 °C for 8 h in oxygen atmosphere.

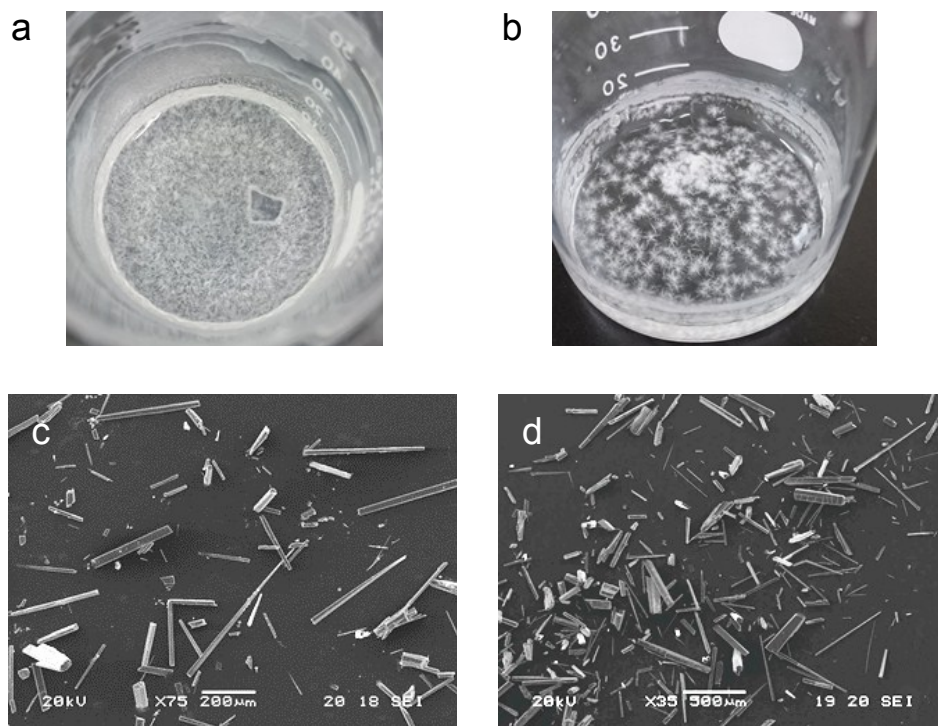

**Fig. S2** (a,b) Optical and (c,d) SEM images of precursor crystals (a,c) with and (b,d) without a piece of silicon wafer.

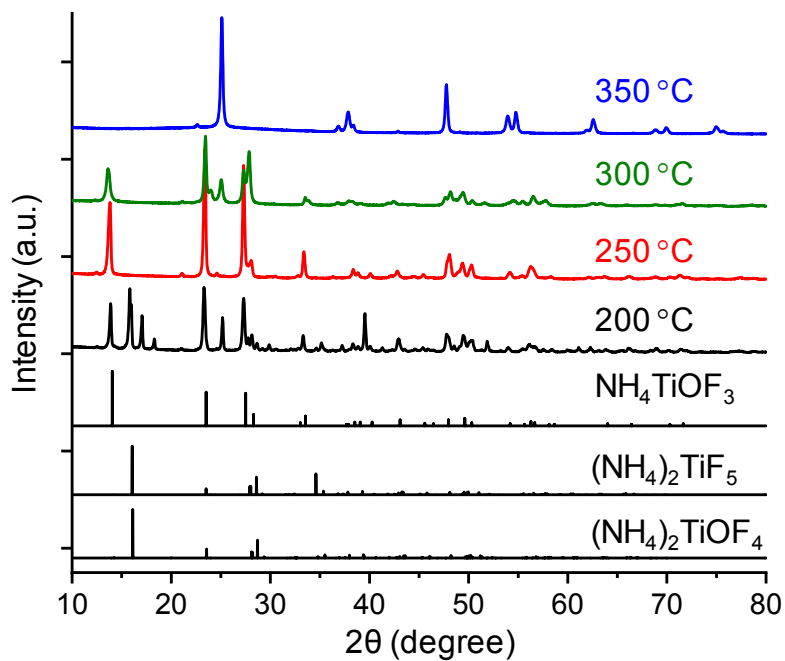

**Fig. S3** Powder XRD patterns of the products obtained at different annealing temperature.

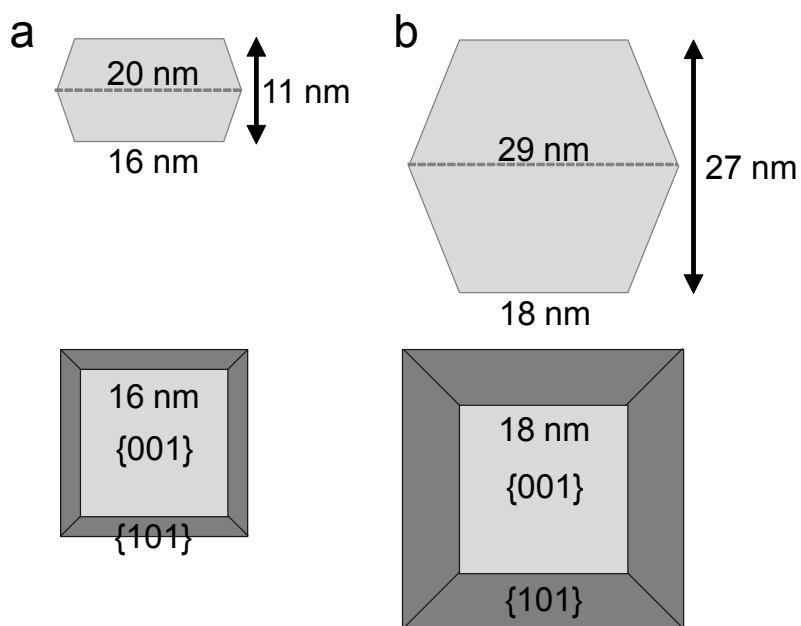

**Fig. S4** Crystal shape and size of (a) TMC-400 and (b) TMC-800.

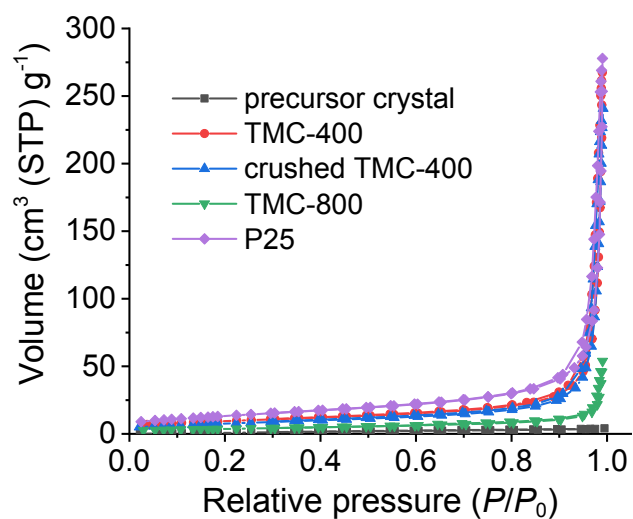

**Fig. S5**  $N_2$  adsorption-desorption isotherms of the materials.

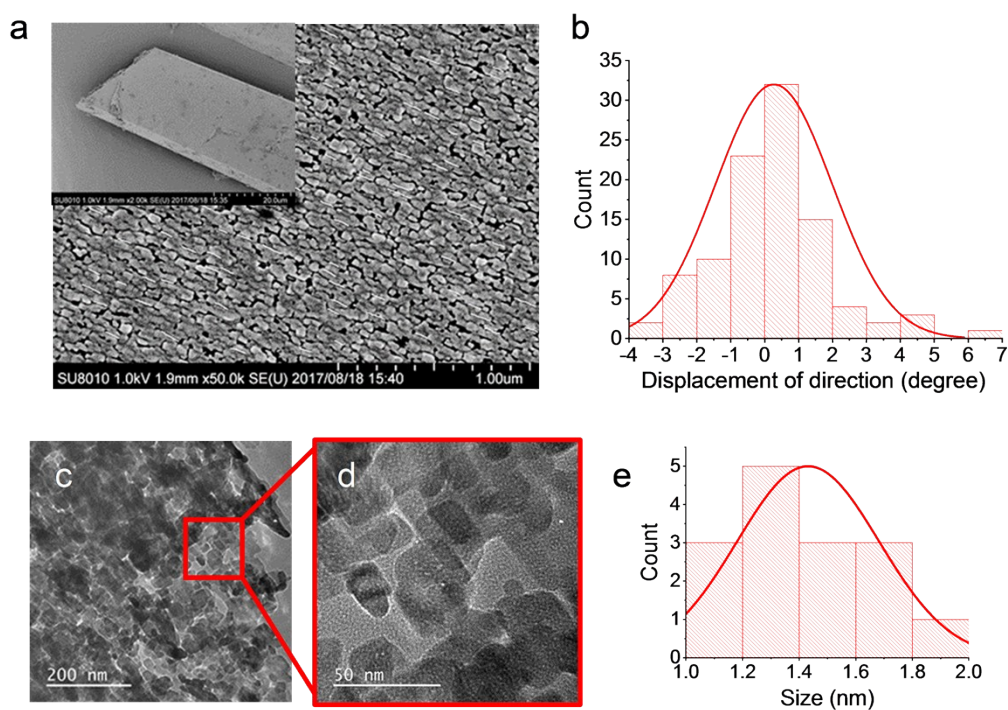

**Fig. S6** (a) FE-SEM images of the TMC-400 surface. (b) Direction displacement of the oriented nanopores in the panel a. (c,d) TEM images of the oriented nanopores. (e) Size distribution of the oriented nanopores.

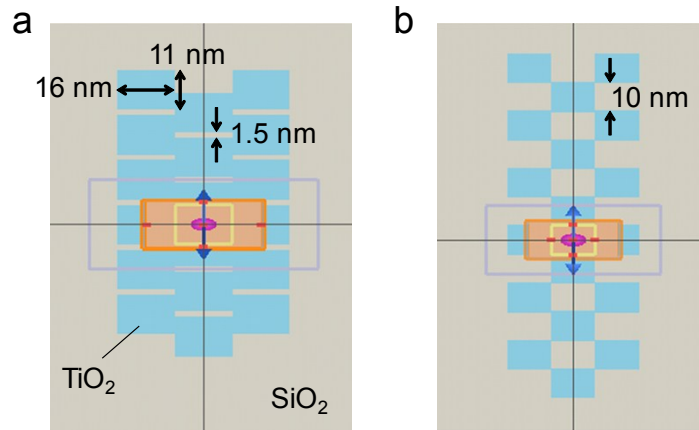

**Fig. S7** (a) Structures used for FDTD calculations. The gaps between  $\text{TiO}_2$  particles ( $16 \text{ nm} (x) \times 11 \text{ nm} (y) \times 16 \text{ nm} (z)$ ) on  $\text{SiO}_2$  ( $1600 \text{ nm} (x) \times 1600 \text{ nm} (y) \times 1600 \text{ nm} (z)$ ) are set to  $1.5 \text{ nm}$  (a) and  $10 \text{ nm}$  (b). The orange and yellow squares indicate the simulated and monitored regions, respectively. The purple and blue arrows represent the incident direction of light and its polarization direction, respectively.

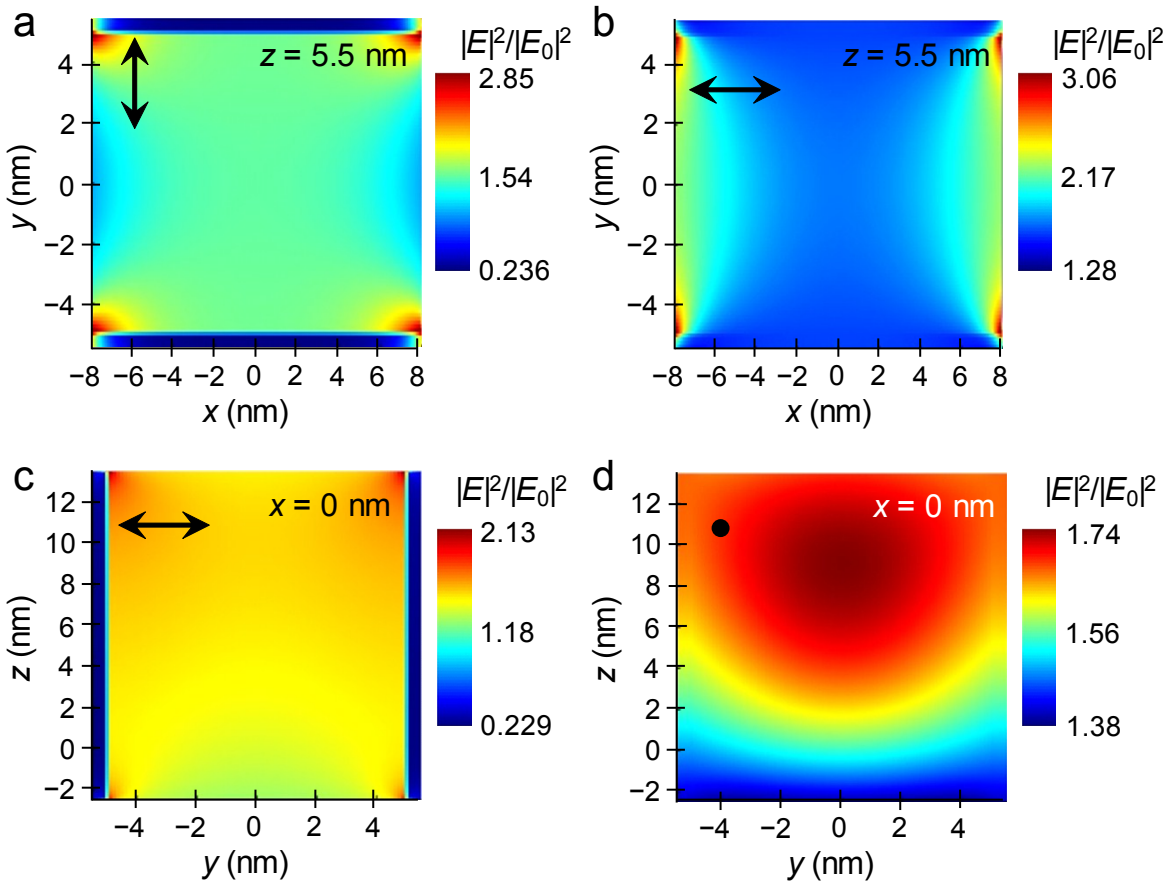

**Fig. S8** (a,b) Distributions of electric fields obtained from the FDTD calculations in the gap of 10 nm between two rectangular  $\text{TiO}_2$  particles at the  $x$ - $y$  plane cut at the center of  $\text{TiO}_2$  particle ( $z = 5.5$  nm) when the polarization of the incident light ( $\lambda = 405$  nm) is along  $y$  (a) and  $x$  (b) axes. (c,d) Distributions of electric fields at the  $y$ - $z$  plane cut at the center of  $\text{TiO}_2$  particle ( $x = 0$  nm) when the polarization of the incident light is along  $y$  (c) and  $x$  (d) axes. The arrows in images represent the polarization direction of incident light.

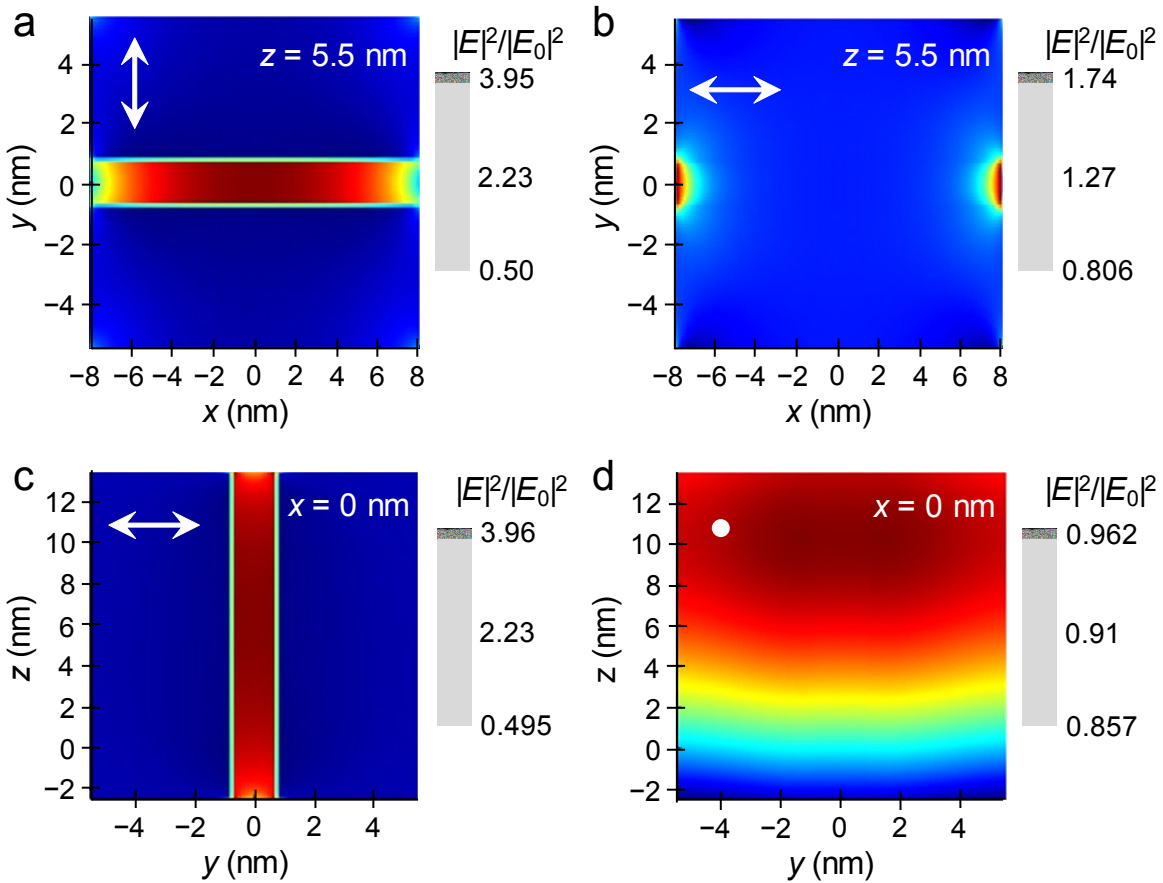

**Fig. S9** (a,b) Distributions of electric fields obtained from the FDTD calculations in the gap of 1.5 nm between two rectangular  $\text{TiO}_2$  particles at the  $x$ - $y$  plane cut at the center of  $\text{TiO}_2$  particle ( $z = 5.5$  nm) when the polarization of the incident light ( $\lambda = 365$  nm) is along  $y$  (a) and  $x$  (b) axes. (c,d) Distributions of electric fields at the  $y$ - $z$  plane cut at the center of  $\text{TiO}_2$  particle ( $x = 0$  nm) when the polarization of the incident light is along  $y$  (c) and  $x$  (d) axes. The arrows in images represent the polarization direction of incident light.



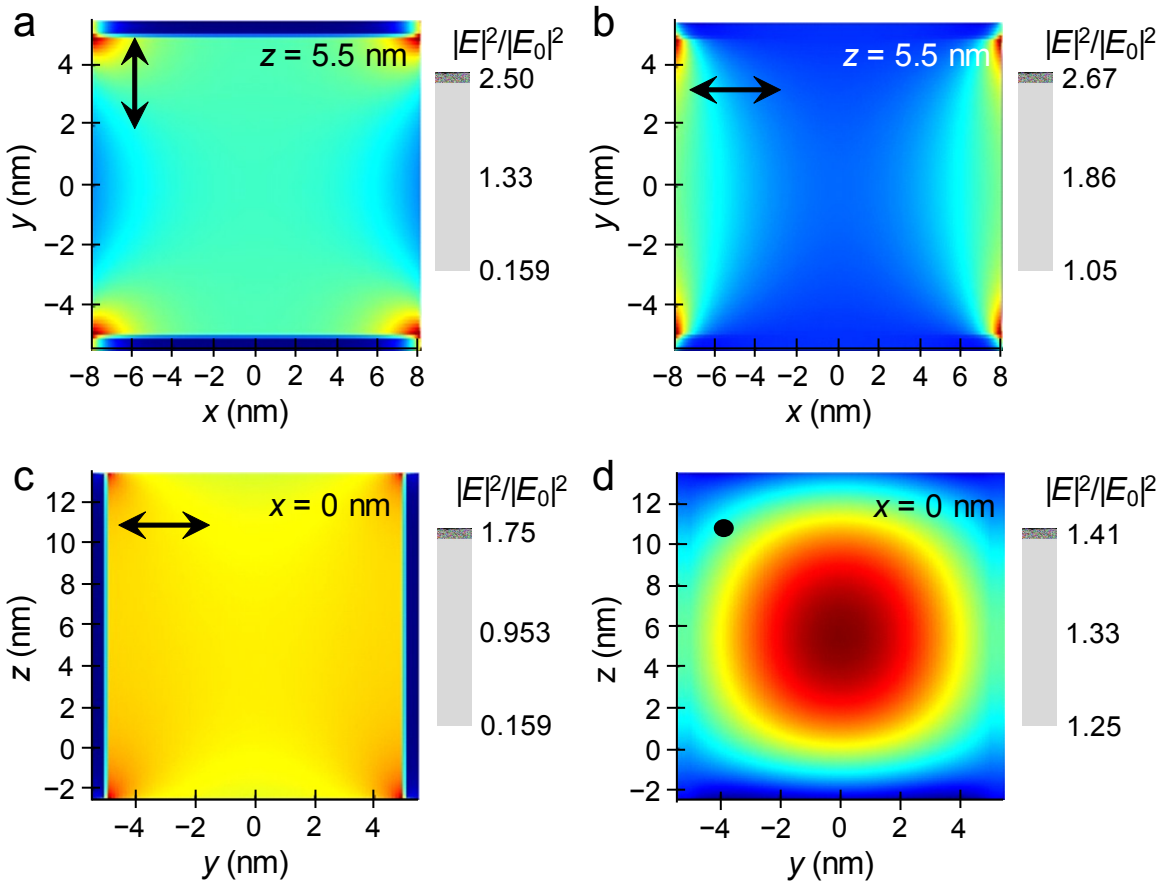

**Fig. S10** (a,b) Distributions of electric fields obtained from the FDTD calculations in the gap of 10 nm between two rectangular  $\text{TiO}_2$  particles at the  $x-y$  plane cut at the center of  $\text{TiO}_2$  particle ( $z = 5.5$  nm) when the polarization of the incident light ( $\lambda = 365$  nm) is along  $y$  (a) and  $x$  (b) axes. (c,d) Distributions of electric fields at the  $y-z$  plane cut at the center of  $\text{TiO}_2$  particle ( $x = 0$  nm) when the polarization of the incident light is along  $y$  (c) and  $x$  (d) axes. The arrows in images represent the polarization direction of incident light.

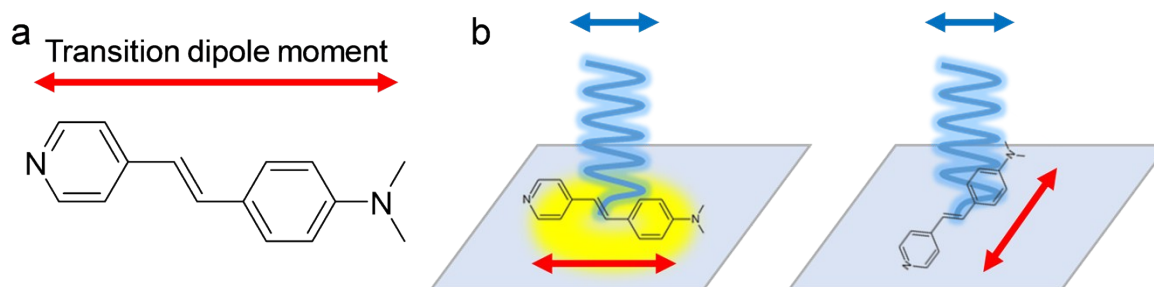

**Fig. S11** (a) The molecular structure and transition dipole moment of 4-[4-(dimethylamino)styryl]pyridine (DMASP). (b) Polarization-dependent fluorescence of DMASP. When the polarization of the excitation light is parallel (or perpendicular) to a transition dipole moment of DMASP, fluorescence becomes the maximum (or minimum).

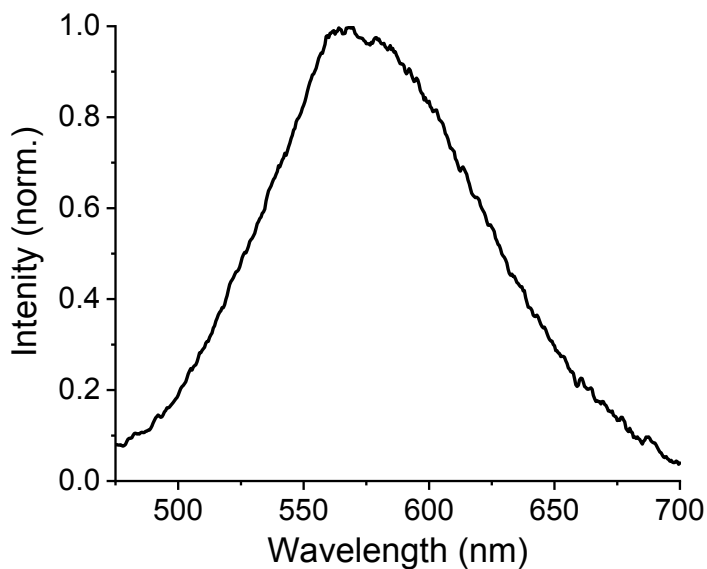

**Fig. S12** Fluorescence spectrum of DMASP-adsorbed TMC in ambient air under 405-nm laser excitation.

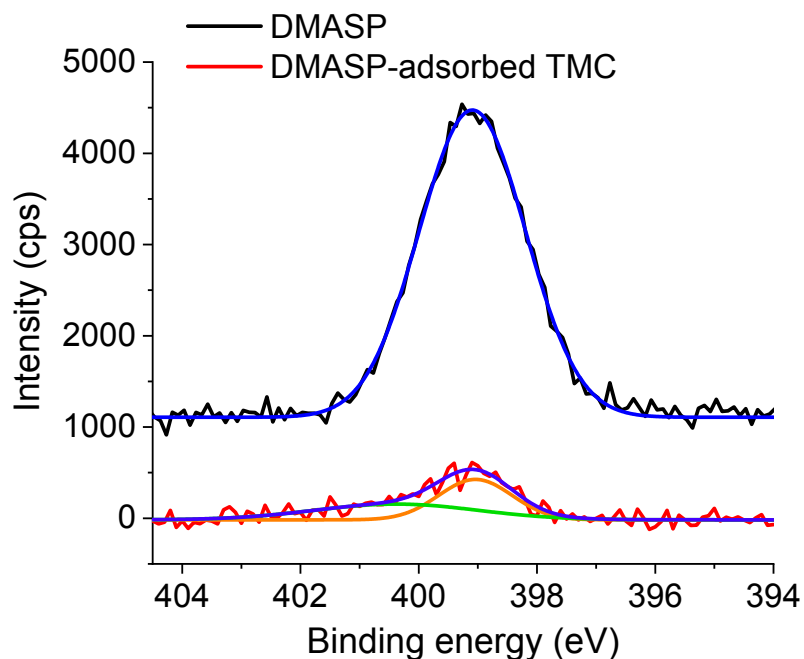

**Fig. S13** N 1s XPS spectra of DMASP adsorbed on TMC (black) and amorphous DMASP molecule (red). The blue lines are the Gaussian fits. The 2 eV shift in the peak position toward a higher binding energy was observed for DMASP-adsorbed TMC (orange and green lines).

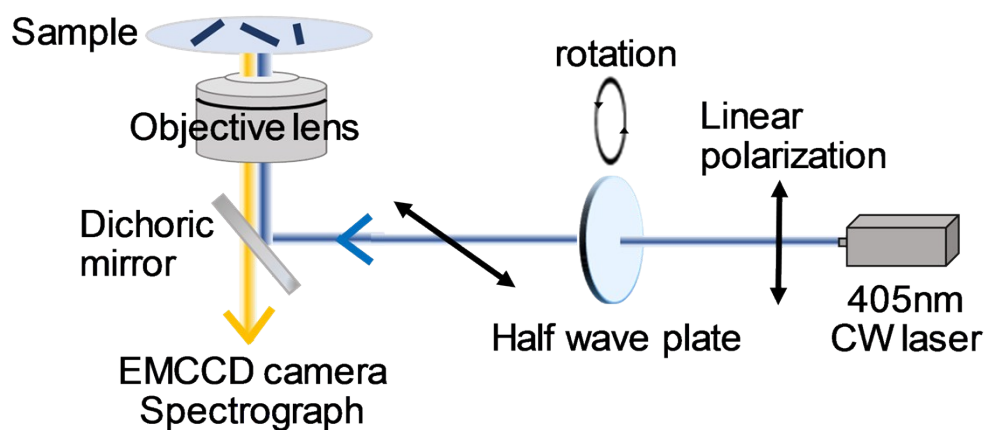

**Fig. S14** Illustration of fluorescence microscope system.

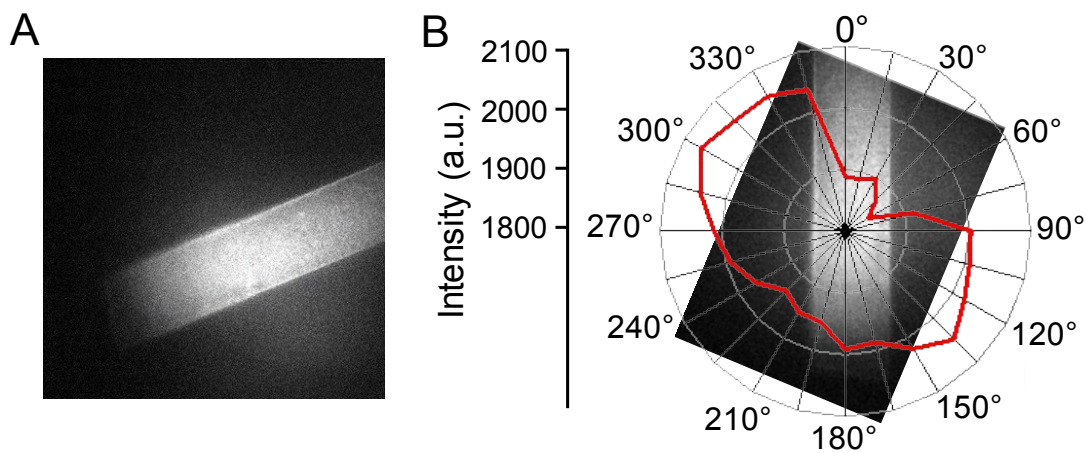

**Fig. S15** (a) A fluorescence image of DMASP-adsorbed TMC-800. The long and short axes of TMC are defined as  $0^\circ$  and  $90^\circ$ , respectively. (b) Azimuthal plot of the fluorescence intensity response of the DMASP to the polarization of excitation light. The percentage difference was calculated to be  $8 \pm 3\%$ .

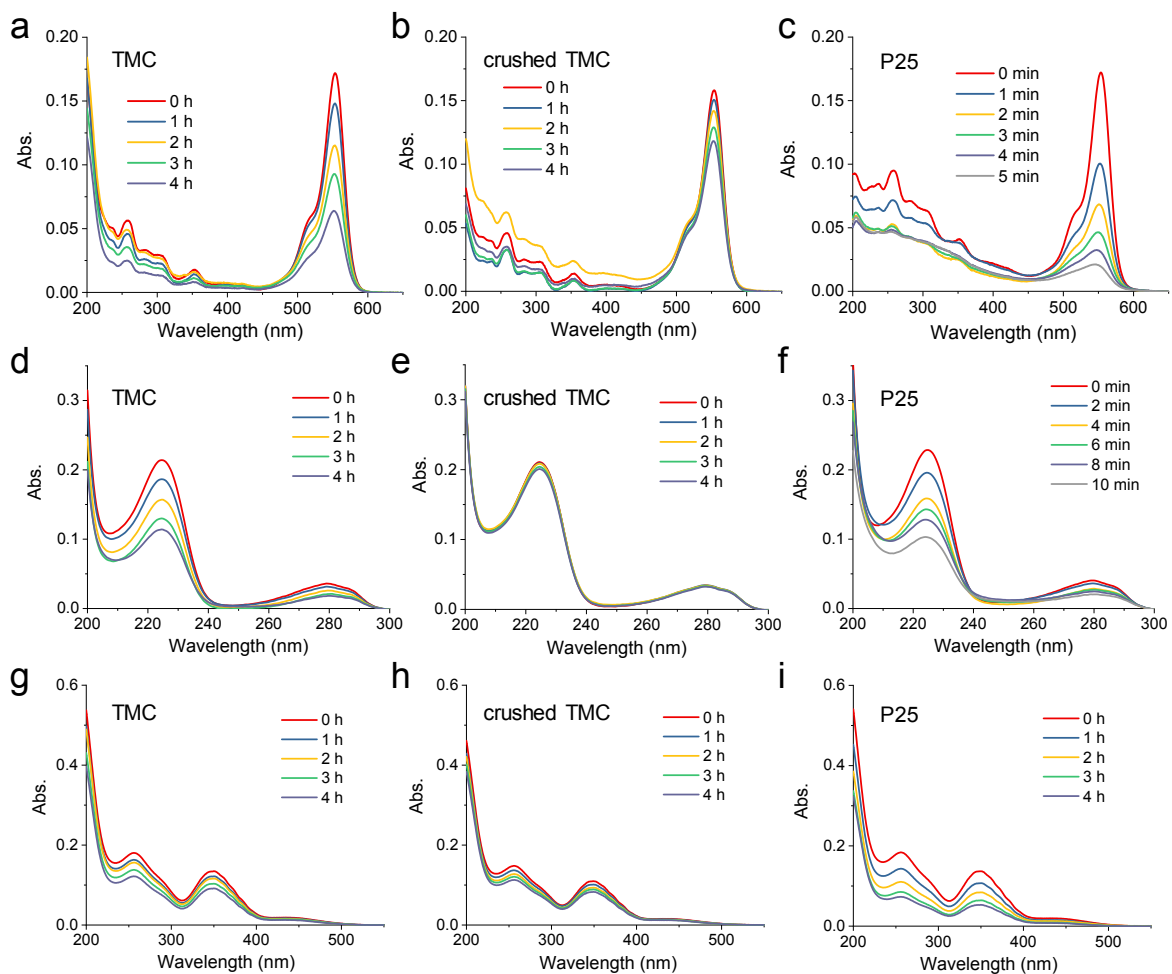

**Fig. S16** UV-vis absorption spectra of the test solutions containing (a-c) RhB, (d-f) 4-CP, or (g-i)  $\text{Cr}^{6+}$  before and after UV irradiation.

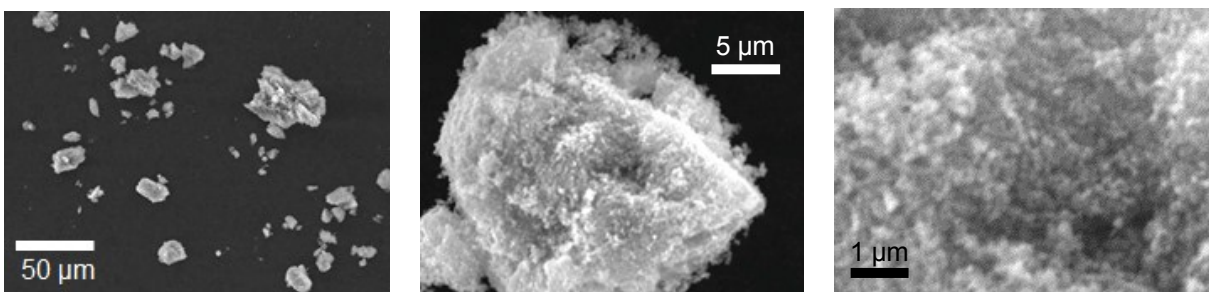

**Fig. S17** SEM images of crushed TMC.
